# Supplementary material
Source: publisher figshare collection journal article supplement (https://frontiersin.figshare.com/ndownloader/files/15605750)
Supplement: Supplementary file [file 15605750]

# Supplementary Figure S1

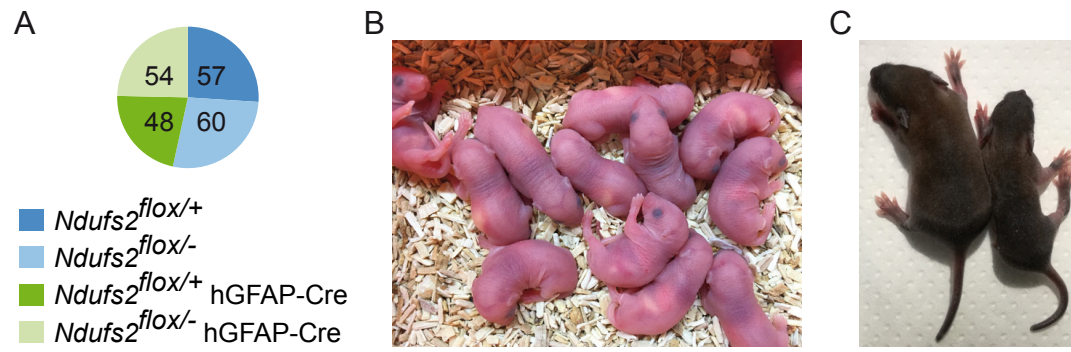

**Figure S1.** (A) Distribution of the offspring generated by crossing *Ndufs2*<sup>flox/flox</sup> with *Ndufs2*<sup>+/-</sup>; hGFAP-Cre mice. The number of analyzed mice is indicated for each genotype. Mutant mice were born at the expected Mendelian ratio (Chi-squared test). (B) Photograph of a P0 litter that included three hGFAP-NDUFS2 mice. (C) Photograph of a P7 *Ndufs2*<sup>flox/+</sup> control mouse (left) and a hGFAP-NDUFS2 littermate mouse (right).

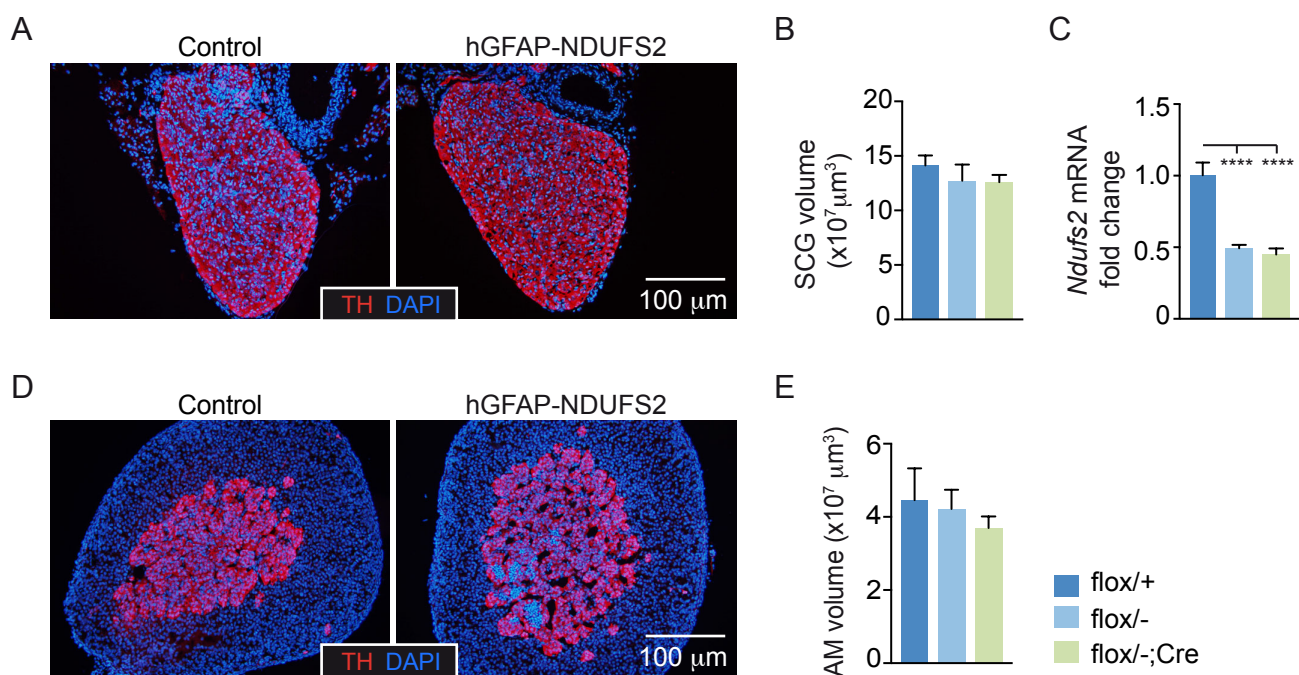

**Figure S2. Effect of NDUFS2-deficiency on peripheral neural tissues in P7 mice.** (A) Immunofluorescence detection of TH (red) in SCG sections in *Ndufs2*<sup>flox/+</sup> control (left) and hGFAP-NDUFS2 (right) mice. Nuclei were counterstained with DAPI (blue). (B) SCG volume (n= 4-9 mice/group). (C) *Ndufs2* mRNA levels in SCG (n=3 experiments from pooled samples). (D) Immunofluorescence detection of TH (red) in AM sections in *Ndufs2*<sup>flox/+</sup> control (left) and hGFAP-NDUFS2 (right) mice. Nuclei were counterstained with DAPI (blue). (E) AM volume (n= 3-10 mice/group). Data are presented as mean  $\pm$  SEM. \*\*\*\*p<0.0001 (One Way ANOVA and Tukey's *post hoc* test).

Supplementary Figure S3

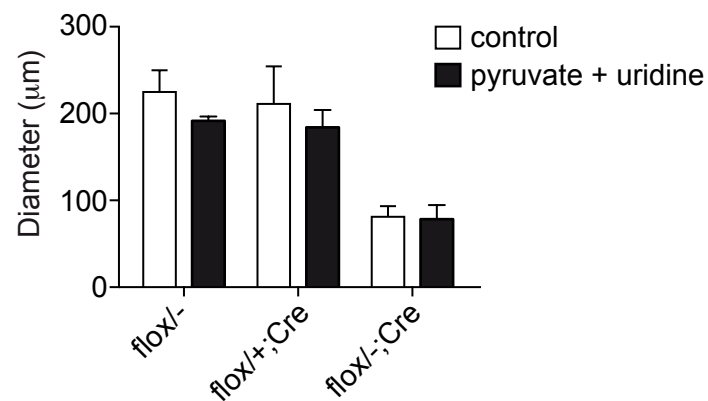

**Figure S3. Pyruvate and uridine addition does not stimulate MCI-deficient NSPCs proliferation.** SVZ-neurosphere core diameter in 7-day cultures from P7 *Ndufs2* and hGFAP-Cre mutant (flox/-; flox/+Cre; flox/-Cre) mice. Neurospheres were cultured in control conditions or in the presence of 2 mM sodium pyruvate and 0.1 mg/mL uridine. Data are presented as mean  $\pm$  SEM (n=2 mice/condition).
